# Supplementary material for: Peritoneal Dialysis and Mortality, Kidney Transplant, and Transition to Hemodialysis: Trends From 1996-2015 in the United States
Source: PubMed Central journal article supplement — Kidney Med. 2020 Aug 7;2(5):610–619.e1. doi: 10.1016/j.xkme.2020.06.009 (PMC7568078; doi:10.1016/j.xkme.2020.06.009), 2020-08-07
Supplement: mmc1.pdf [file mmc1.pdf]

**Figure S1a-c.** Crude rates of: (a) Transition to in-center HD, (b) Death, and (c) Transplantation, by months on PD, for grouped incident PD patient cohorts (1996-2011).

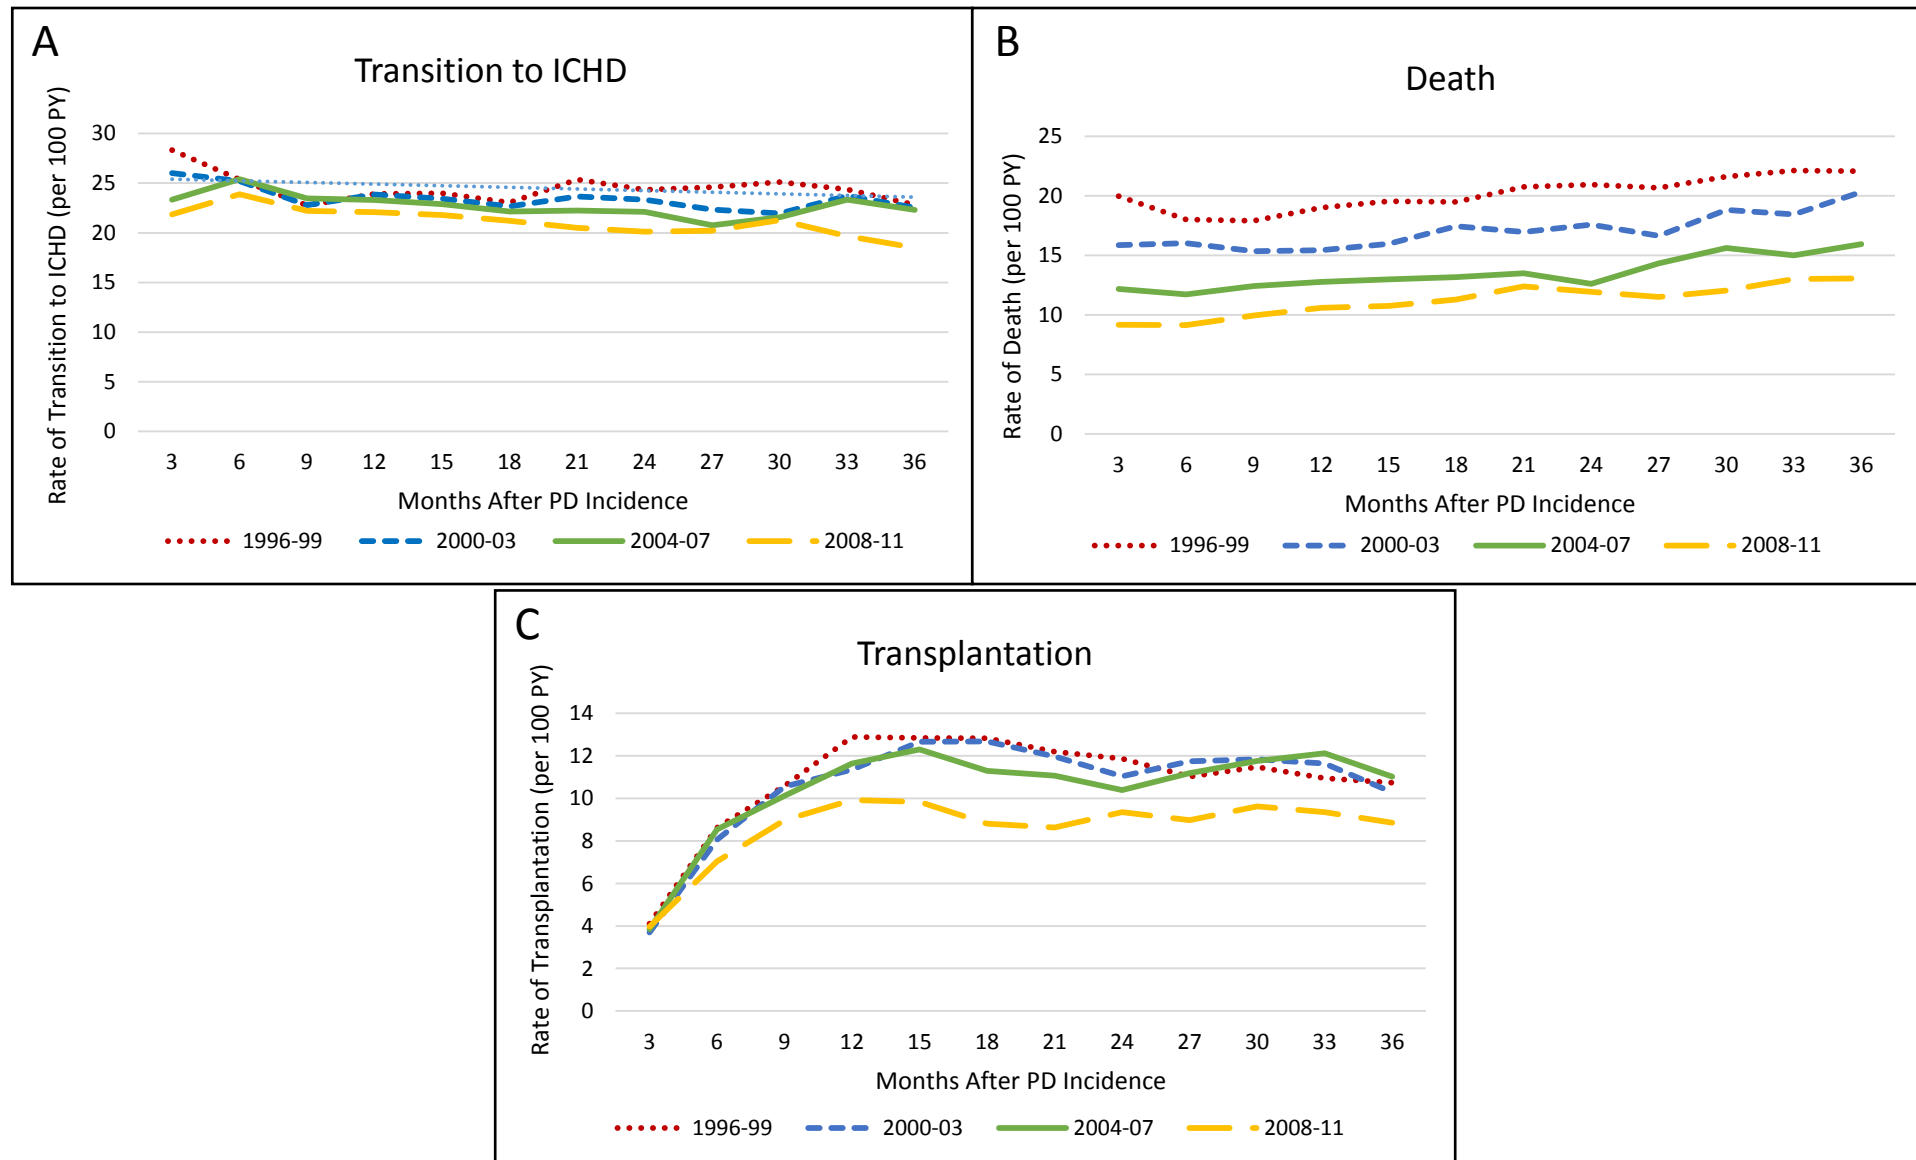

**Table S1.** Hazard ratios for (a) transition to ICHD, (b) death, and (c) transplant by patient- and facility-level variables, among incident PD patients.

|                      |                                       | Transition to ICHD      |        | Death        |        | Transplant   |        |             |
|----------------------|---------------------------------------|-------------------------|--------|--------------|--------|--------------|--------|-------------|
| Covariates           |                                       | Hazard ratio            | 95% CI | Hazard ratio | 95% CI | Hazard ratio | 95% CI |             |
| <b>Cohort Year</b>   | (ref: 1996-1999)                      | 2000-2003               | 0.95   | (0.93,0.97)  | 0.86   | (0.83,0.88)  | 0.97   | (0.94,1.01) |
|                      |                                       | 2004-2007               | 0.92   | (0.89,0.95)  | 0.65   | (0.63,0.68)  | 1.00   | (0.96,1.05) |
|                      |                                       | 2008-2011               | 0.85   | (0.82,0.87)  | 0.53   | (0.51,0.55)  | 0.88   | (0.84,0.92) |
| <b>Age (years)</b>   | (ref: 45-64)                          | 0-21                    | 0.80   | (0.76,0.84)  | 0.52   | (0.48,0.57)  | 3.16   | (3.02,3.30) |
|                      |                                       | 22-44                   | 1.00   | (0.98,1.03)  | 0.51   | (0.48,0.53)  | 1.73   | (1.68,1.78) |
|                      |                                       | 65-74                   | 1.10   | (1.08,1.12)  | 1.77   | (1.73,1.81)  | 0.39   | (0.36,0.41) |
|                      |                                       | ≥75                     | 1.21   | (1.18,1.25)  | 2.97   | (2.89,3.06)  | 0.06   | (0.05,0.07) |
| <b>Sex</b>           | (ref: Male)                           | Female                  | 0.99   | (0.97,1.01)  | 1.09   | (1.07,1.12)  | 0.85   | (0.83,0.87) |
| <b>Race</b>          | (ref: White)                          | African American        | 1.16   | (1.13,1.18)  | 0.76   | (0.74,0.78)  | 0.42   | (0.40,0.43) |
|                      |                                       | Asian                   | 0.68   | (0.65,0.71)  | 0.55   | (0.51,0.59)  | 0.70   | (0.66,0.74) |
|                      |                                       | Other                   | 0.92   | (0.88,0.96)  | 0.86   | (0.82,0.91)  | 0.66   | (0.62,0.70) |
|                      |                                       | Unknown/Missing         | 0.95   | (0.82,1.10)  | 2.71   | (2.35,3.11)  | 0.48   | (0.38,0.61) |
| <b>Ethnicity</b>     | (ref: Non-Hispanic)                   | Hispanic                | 0.97   | (0.95,1.00)  | 0.74   | (0.71,0.77)  | 0.61   | (0.58,0.64) |
| <b>Comorbidities</b> | (ref: Without respective comorbidity) | Cardiovascular disease* | 1.00   | (0.98,1.02)  | 1.26   | (1.23,1.29)  | 0.74   | (0.71,0.77) |
|                      |                                       | CHF                     | 1.09   | (1.07,1.11)  | 1.63   | (1.60,1.67)  | 0.55   | (0.52,0.58) |
|                      |                                       | COPD                    | 1.08   | (1.04,1.13)  | 1.35   | (1.30,1.40)  | 0.61   | (0.54,0.68) |
|                      |                                       | CVA/TIA                 | 1.05   | (1.02,1.09)  | 1.25   | (1.21,1.30)  | 0.66   | (0.60,0.72) |
|                      |                                       | PVD                     | 1.01   | (0.98,1.04)  | 1.18   | (1.14,1.21)  | 0.63   | (0.59,0.68) |
|                      |                                       | Hypertension            | 1.01   | (0.98,1.03)  | 0.71   | (0.69,0.73)  | 1.06   | (1.02,1.09) |
|                      |                                       | Diabetes                | 1.19   | (1.15,1.24)  | 1.44   | (1.38,1.51)  | 0.76   | (0.70,0.83) |
|                      |                                       | Cancer                  | 1.06   | (1.01,1.10)  | 1.27   | (1.22,1.32)  | 0.54   | (0.49,0.60) |
|                      |                                       | Tobacco use             | 1.12   | (1.09,1.16)  | 1.06   | (1.01,1.10)  | 0.60   | (0.56,0.64) |
|                      |                                       | Alcohol/Drug dependence | 1.30   | (1.21,1.40)  | 1.41   | (1.26,1.57)  | 0.48   | (0.40,0.59) |
|                      |                                       | Immobility**            | 1.18   | (1.10,1.26)  | 2.46   | (2.32,2.61)  | 0.47   | (0.39,0.55) |
| <b>Cause of ESRD</b> | (ref: Diabetes)                       | Hypertension            | 0.96   | (0.92,1.00)  | 1.10   | (1.05,1.16)  | 0.79   | (0.73,0.86) |
|                      |                                       | Glomerular Disease      | 0.92   | (0.88,0.96)  | 0.72   | (0.68,0.76)  | 1.18   | (1.09,1.29) |

|                           |                        |                   |      |             |      |             |      |             |
|---------------------------|------------------------|-------------------|------|-------------|------|-------------|------|-------------|
|                           |                        | Other             | 0.96 | (0.92,1.01) | 1.13 | (1.07,1.19) | 1.12 | (1.02,1.22) |
|                           |                        | Unknown/Missing   | 0.94 | (0.89,1.00) | 1.07 | (0.99,1.14) | 1.04 | (0.94,1.15) |
| <b>PD program size</b>    | (ref: ≥25 PD patients) | ≤6 PD patients    | 1.36 | (1.32,1.40) | 1.07 | (1.03,1.11) | 1.00 | (0.96,1.05) |
|                           |                        | 7-12 PD patients  | 1.21 | (1.18,1.24) | 1.04 | (1.00,1.07) | 1.03 | (0.99,1.07) |
|                           |                        | 13-24 PD patients | 1.11 | (1.09,1.13) | 0.99 | (0.96,1.02) | 1.01 | (0.98,1.04) |
| <b>Facility Ownership</b> | (ref: LDO)             | Hospital-Based    | 0.96 | (0.93,0.99) | 0.99 | (0.95,1.02) | 1.04 | (1.00,1.09) |
|                           |                        | Independent       | 1.03 | (1.00,1.06) | 0.99 | (0.96,1.03) | 1.07 | (1.02,1.11) |
|                           |                        | OTHDO             | 1.02 | (0.99,1.06) | 0.97 | (0.92,1.01) | 1.10 | (1.04,1.16) |
| <b>Facility Network</b>   | (ref: NET_01)          | NET_02            | 1.12 | (1.06,1.18) | 1.01 | (0.95,1.08) | 0.91 | (0.83,0.99) |
|                           |                        | NET_03            | 1.20 | (1.13,1.27) | 1.09 | (1.01,1.17) | 1.12 | (1.01,1.23) |
|                           |                        | NET_04            | 1.01 | (0.95,1.07) | 1.07 | (1.00,1.15) | 1.23 | (1.13,1.34) |
|                           |                        | NET_05            | 0.99 | (0.94,1.05) | 1.10 | (1.03,1.17) | 1.06 | (0.98,1.15) |
|                           |                        | NET_06            | 1.18 | (1.13,1.24) | 1.02 | (0.96,1.08) | 0.96 | (0.89,1.04) |
|                           |                        | NET_07            | 1.17 | (1.11,1.23) | 0.98 | (0.91,1.04) | 1.05 | (0.97,1.14) |
|                           |                        | NET_08            | 1.18 | (1.12,1.24) | 1.13 | (1.06,1.20) | 0.93 | (0.86,1.01) |
|                           |                        | NET_09            | 1.04 | (1.00,1.10) | 1.10 | (1.04,1.16) | 1.05 | (0.98,1.13) |
|                           |                        | NET_10            | 0.96 | (0.90,1.01) | 1.11 | (1.04,1.18) | 1.14 | (1.05,1.24) |
|                           |                        | NET_11            | 1.13 | (1.08,1.19) | 1.07 | (1.01,1.13) | 1.26 | (1.17,1.36) |
|                           |                        | NET_12            | 1.12 | (1.06,1.18) | 1.02 | (0.96,1.09) | 0.95 | (0.87,1.04) |
|                           |                        | NET_13            | 1.17 | (1.11,1.23) | 1.05 | (0.99,1.13) | 0.96 | (0.88,1.04) |
|                           |                        | NET_14            | 1.16 | (1.10,1.22) | 1.05 | (0.98,1.11) | 0.82 | (0.75,0.88) |
|                           |                        | NET_15            | 1.12 | (1.06,1.18) | 0.90 | (0.84,0.96) | 0.95 | (0.87,1.03) |
|                           |                        | NET_16            | 1.22 | (1.15,1.29) | 0.87 | (0.81,0.94) | 1.08 | (0.99,1.17) |
|                           |                        | NET_17            | 0.94 | (0.89,1.00) | 0.96 | (0.89,1.02) | 0.74 | (0.68,0.81) |
|                           |                        | NET_18            | 0.98 | (0.93,1.03) | 0.96 | (0.90,1.02) | 0.68 | (0.63,0.74) |
| <b>Facility Location</b>  | (ref: Urban)           | Rural             | 0.98 | (0.96,1.00) | 1.05 | (1.02,1.08) | 0.91 | (0.87,0.94) |

Footnote: CHF=congestive heart failure; COPD=chronic obstructive pulmonary disease; CVA/TIA=cerebrovascular accident/transient ischemic attack; PVD=peripheral vascular disease; OTHDO=other dialysis organization; NET=network

\*Cardiovascular disease = atherosclerotic heart disease and other cardiac disease

\*\*Immobility = inability to transfer or ambulate

**Table S2a.** Hazard ratios for transition to ICHD according to grouped cohort years of PD incidence by patient- and facility-level variables.

|                         |                                       |                         | 1996-1999    |             | 2000-2003    |             | 2004-2007    |             | 2008-2011    |             |
|-------------------------|---------------------------------------|-------------------------|--------------|-------------|--------------|-------------|--------------|-------------|--------------|-------------|
| Covariates              |                                       |                         | Hazard ratio | 95% CI      |
| <b>Age (years)</b>      | (ref: 45-64)                          | 0-21                    | 0.77         | (0.70,0.84) | 0.72         | (0.66,0.80) | 0.83         | (0.75,0.92) | 0.91         | (0.82,1.01) |
|                         |                                       | 22-44                   | 0.98         | (0.94,1.02) | 0.94         | (0.90,0.99) | 1.00         | (0.96,1.05) | 1.11         | (1.06,1.16) |
|                         |                                       | 65-74                   | 1.12         | (1.07,1.16) | 1.10         | (1.06,1.15) | 1.08         | (1.03,1.13) | 1.10         | (1.05,1.15) |
|                         |                                       | ≥75                     | 1.30         | (1.23,1.37) | 1.25         | (1.18,1.32) | 1.18         | (1.12,1.25) | 1.14         | (1.08,1.20) |
| <b>Sex</b>              | (ref: Male)                           | Female                  | 1.00         | (0.97,1.04) | 1.01         | (0.98,1.05) | 0.99         | (0.96,1.02) | 0.95         | (0.92,0.98) |
| <b>Race</b>             | (ref: White)                          | African American        | 1.21         | (1.16,1.25) | 1.17         | (1.12,1.22) | 1.13         | (1.08,1.18) | 1.11         | (1.07,1.16) |
|                         |                                       | Asian                   | 0.68         | (0.62,0.76) | 0.68         | (0.62,0.75) | 0.69         | (0.63,0.77) | 0.66         | (0.60,0.72) |
|                         |                                       | Other                   | 0.97         | (0.91,1.04) | 0.96         | (0.89,1.03) | 0.85         | (0.77,0.94) | 0.94         | (0.84,1.04) |
|                         |                                       | Unknown/Missing         | 0.87         | (0.65,1.16) | 1.13         | (0.79,1.62) | 0.76         | (0.49,1.18) | 1.03         | (0.82,1.29) |
| <b>Ethnicity</b>        | (ref: Non-Hispanic)                   | Hispanic                | 0.97         | (0.92,1.03) | 1.02         | (0.97,1.08) | 0.97         | (0.91,1.03) | 0.92         | (0.87,0.97) |
| <b>Comorbidities</b>    | (ref: Without respective comorbidity) | Cardiovascular disease* | 0.99         | (0.95,1.03) | 1.00         | (0.96,1.05) | 1.02         | (0.98,1.06) | 1.00         | (0.96,1.04) |
|                         |                                       | CHF                     | 1.05         | (1.01,1.09) | 1.07         | (1.02,1.11) | 1.13         | (1.08,1.18) | 1.12         | (1.08,1.17) |
|                         |                                       | COPD                    | 1.08         | (1.00,1.17) | 1.10         | (1.01,1.19) | 1.04         | (0.95,1.12) | 1.10         | (1.02,1.19) |
|                         |                                       | CVA/TIA                 | 1.01         | (0.94,1.08) | 1.05         | (0.98,1.12) | 1.07         | (0.99,1.14) | 1.08         | (1.01,1.15) |
|                         |                                       | PVD                     | 1.04         | (0.99,1.09) | 0.99         | (0.94,1.04) | 1.00         | (0.94,1.06) | 0.99         | (0.94,1.05) |
|                         |                                       | Hypertension            | 0.98         | (0.94,1.02) | 1.03         | (0.98,1.08) | 1.02         | (0.97,1.07) | 1.01         | (0.96,1.07) |
|                         |                                       | Diabetes                | 1.12         | (0.98,1.27) | 1.27         | (1.13,1.42) | 1.23         | (1.15,1.32) | 1.23         | (1.16,1.30) |
|                         |                                       | Cancer                  | 1.05         | (0.96,1.14) | 1.06         | (0.98,1.16) | 1.05         | (0.98,1.14) | 1.07         | (0.99,1.15) |
|                         |                                       | Tobacco use             | 1.10         | (1.03,1.17) | 1.11         | (1.03,1.19) | 1.11         | (1.04,1.19) | 1.17         | (1.10,1.24) |
| Alcohol/Drug dependence | 1.18                                  | (1.03,1.36)             | 1.20         | (1.02,1.41) | 1.58         | (1.36,1.83) | 1.29         | (1.12,1.49) |              |             |
|                         |                                       | Immobility**            | 1.07         | (0.94,1.21) | 1.26         | (1.09,1.46) | 1.15         | (0.99,1.33) | 1.27         | (1.11,1.46) |
| <b>Cause of ESRD</b>    | (ref: Diabetes)                       | Hypertension            | 0.94         | (0.83,1.08) | 1.05         | (0.94,1.18) | 0.95         | (0.88,1.02) | 0.95         | (0.90,1.01) |
|                         |                                       | Glomerular Disease      | 0.91         | (0.80,1.04) | 0.98         | (0.87,1.10) | 0.92         | (0.85,1.00) | 0.89         | (0.83,0.96) |
|                         |                                       | Other                   | 0.95         | (0.83,1.09) | 1.01         | (0.90,1.14) | 1.01         | (0.93,1.10) | 0.92         | (0.86,0.99) |
|                         |                                       | Unknown/Missing         | 0.96         | (0.83,1.12) | 1.00         | (0.87,1.15) | 0.96         | (0.86,1.07) | 0.86         | (0.77,0.96) |
| <b>PD program size</b>  | (ref: ≥25 PD patients)                | ≤6 PD patients          | 1.35         | (1.28,1.43) | 1.40         | (1.32,1.49) | 1.35         | (1.28,1.43) | 1.35         | (1.28,1.43) |
|                         |                                       | 7-12 PD patients        | 1.21         | (1.15,1.28) | 1.26         | (1.19,1.32) | 1.22         | (1.15,1.28) | 1.18         | (1.12,1.24) |
|                         |                                       | 13-24 PD patients       | 1.12         | (1.08,1.17) | 1.14         | (1.09,1.18) | 1.08         | (1.04,1.13) | 1.10         | (1.05,1.14) |
| <b>Facility</b>         | (ref: LDO)                            | Hospital-Based          | 1.06         | (0.96,1.17) | 0.94         | (0.84,1.05) | 0.93         | (0.88,0.99) | 0.97         | (0.91,1.03) |

|                          |               |             |      |             |      |             |      |             |      |             |
|--------------------------|---------------|-------------|------|-------------|------|-------------|------|-------------|------|-------------|
| <b>Ownership</b>         |               |             |      |             |      |             |      |             |      |             |
|                          |               | Independent | 1.12 | (1.02,1.24) | 1.00 | (0.90,1.12) | 0.99 | (0.94,1.04) | 1.04 | (0.99,1.09) |
|                          |               | OTHDO***    | .    | .           | 0.99 | (0.32,3.02) | 1.01 | (0.97,1.06) | 1.03 | (0.98,1.07) |
| <b>Facility Network</b>  | (ref: NET_01) | NET_02      | 1.09 | (0.99,1.20) | 1.16 | (1.05,1.29) | 1.19 | (1.06,1.33) | 1.05 | (0.94,1.18) |
|                          |               | NET_03      | 1.19 | (1.08,1.32) | 1.19 | (1.06,1.34) | 1.15 | (1.01,1.32) | 1.20 | (1.06,1.37) |
|                          |               | NET_04      | 0.83 | (0.73,0.93) | 1.12 | (1.00,1.25) | 1.19 | (1.06,1.34) | 0.92 | (0.81,1.03) |
|                          |               | NET_05      | 1.00 | (0.91,1.11) | 1.05 | (0.95,1.16) | 0.99 | (0.89,1.10) | 0.93 | (0.83,1.03) |
|                          |               | NET_06      | 1.24 | (1.13,1.35) | 1.21 | (1.10,1.32) | 1.22 | (1.11,1.35) | 1.07 | (0.97,1.18) |
|                          |               | NET_07      | 1.19 | (1.08,1.32) | 1.09 | (0.98,1.20) | 1.28 | (1.15,1.42) | 1.11 | (1.00,1.24) |
|                          |               | NET_08      | 1.16 | (1.05,1.28) | 1.08 | (0.97,1.19) | 1.27 | (1.14,1.41) | 1.18 | (1.06,1.31) |
|                          |               | NET_09      | 1.05 | (0.96,1.15) | 1.08 | (0.98,1.19) | 1.12 | (1.01,1.24) | 0.95 | (0.86,1.06) |
|                          |               | NET_10      | 1.14 | (1.02,1.26) | 0.87 | (0.78,0.97) | 0.92 | (0.82,1.04) | 0.89 | (0.79,1.00) |
|                          |               | NET_11      | 1.19 | (1.09,1.31) | 1.15 | (1.05,1.27) | 1.17 | (1.05,1.30) | 0.99 | (0.89,1.11) |
|                          |               | NET_12      | 1.27 | (1.15,1.41) | 1.04 | (0.94,1.16) | 1.13 | (1.01,1.26) | 1.03 | (0.92,1.16) |
|                          |               | NET_13      | 1.18 | (1.06,1.31) | 1.16 | (1.04,1.29) | 1.31 | (1.17,1.46) | 1.05 | (0.94,1.17) |
|                          |               | NET_14      | 1.23 | (1.12,1.36) | 1.20 | (1.09,1.32) | 1.19 | (1.08,1.33) | 1.03 | (0.93,1.14) |
|                          |               | NET_15      | 1.12 | (1.01,1.24) | 1.12 | (1.01,1.25) | 1.24 | (1.11,1.39) | 1.01 | (0.91,1.13) |
|                          |               | NET_16      | 1.23 | (1.10,1.38) | 1.24 | (1.11,1.38) | 1.25 | (1.11,1.40) | 1.17 | (1.05,1.31) |
|                          |               | NET_17      | 0.93 | (0.83,1.04) | 0.99 | (0.88,1.10) | 1.01 | (0.90,1.13) | 0.84 | (0.75,0.95) |
|                          |               | NET_18      | 1.01 | (0.92,1.12) | 1.02 | (0.93,1.13) | 0.97 | (0.87,1.08) | 0.89 | (0.80,0.99) |
| <b>Facility Location</b> | (ref: Urban)  | Rural       | 0.97 | (0.93,1.02) | 0.96 | (0.92,1.01) | 0.96 | (0.91,1.01) | 1.02 | (0.97,1.06) |

Footnote: In 1996-1999, dialysis facilities were broadly grouped as LDO, independent, and hospital based. The OTHDO (Other Dialysis Organization) category was missing at the time, which is why there are no data for this category during this timeframe. CHF=congestive heart failure; COPD=chronic obstructive pulmonary disease; CVA/TIA=cerebrovascular accident/transient ischemic attack; PVD=peripheral vascular disease; OTHDO=other dialysis organization; NET=network

\*Cardiovascular disease = atherosclerotic heart disease and other cardiac disease

\*\*Immobility = inability to transfer or ambulate

**Table S2b.** Hazard ratios for death according to grouped cohort years of PD incidence by patient- and facility-level variables.

|                        |                                       |                         | 1996-1999    |             | 2000-2003    |             | 2004-2007    |             | 2008-2011    |             |
|------------------------|---------------------------------------|-------------------------|--------------|-------------|--------------|-------------|--------------|-------------|--------------|-------------|
| Covariates             |                                       |                         | Hazard ratio | 95% CI      |
| <b>Age (years)</b>     | (ref: 45-64)                          | 0-21                    | 0.44         | (0.37,0.53) | 0.45         | (0.37,0.54) | 0.65         | (0.54,0.79) | 0.70         | (0.57,0.86) |
|                        |                                       | 22-44                   | 0.51         | (0.47,0.54) | 0.48         | (0.44,0.52) | 0.54         | (0.49,0.59) | 0.51         | (0.46,0.57) |
|                        |                                       | 65-74                   | 1.79         | (1.71,1.87) | 1.77         | (1.69,1.86) | 1.76         | (1.67,1.87) | 1.74         | (1.64,1.85) |
|                        |                                       | ≥75                     | 2.97         | (2.82,3.13) | 3.01         | (2.85,3.18) | 2.87         | (2.70,3.05) | 3.05         | (2.87,3.24) |
| <b>Sex</b>             | (ref: Male)                           | Female                  | 1.09         | (1.06,1.13) | 1.11         | (1.07,1.15) | 1.11         | (1.06,1.16) | 1.04         | (1.00,1.09) |
| <b>Race</b>            | (ref: White)                          | African American        | 0.83         | (0.79,0.88) | 0.75         | (0.71,0.80) | 0.76         | (0.71,0.82) | 0.66         | (0.61,0.70) |
|                        |                                       | Asian                   | 0.62         | (0.55,0.70) | 0.48         | (0.42,0.55) | 0.53         | (0.46,0.62) | 0.55         | (0.48,0.63) |
|                        |                                       | Other                   | 0.85         | (0.78,0.92) | 0.84         | (0.76,0.93) | 0.88         | (0.77,1.01) | 0.70         | (0.59,0.83) |
|                        |                                       | Unknown/Missing         | 3.07         | (2.37,3.96) | 3.98         | (2.97,5.32) | 2.56         | (1.66,3.94) | 2.13         | (1.65,2.76) |
| <b>Ethnicity</b>       | (ref: Non-Hispanic)                   | Hispanic                | 0.81         | (0.75,0.87) | 0.79         | (0.73,0.85) | 0.70         | (0.64,0.77) | 0.61         | (0.55,0.67) |
| <b>Comorbidities</b>   | (ref: Without respective comorbidity) | Cardiovascular disease* | 1.27         | (1.22,1.33) | 1.28         | (1.22,1.34) | 1.25         | (1.19,1.32) | 1.24         | (1.18,1.31) |
|                        |                                       | CHF                     | 1.53         | (1.47,1.60) | 1.63         | (1.55,1.70) | 1.74         | (1.65,1.83) | 1.71         | (1.62,1.80) |
|                        |                                       | COPD                    | 1.31         | (1.22,1.41) | 1.38         | (1.28,1.49) | 1.32         | (1.21,1.43) | 1.37         | (1.26,1.48) |
|                        |                                       | CVA/TIA                 | 1.28         | (1.21,1.36) | 1.27         | (1.19,1.36) | 1.23         | (1.14,1.33) | 1.19         | (1.10,1.29) |
|                        |                                       | PVD                     | 1.18         | (1.13,1.24) | 1.18         | (1.11,1.25) | 1.18         | (1.11,1.26) | 1.16         | (1.09,1.24) |
|                        |                                       | Hypertension            | 0.71         | (0.68,0.74) | 0.74         | (0.70,0.78) | 0.73         | (0.68,0.78) | 0.69         | (0.64,0.75) |
|                        |                                       | Diabetes                | 1.69         | (1.48,1.92) | 1.46         | (1.28,1.66) | 1.43         | (1.31,1.56) | 1.41         | (1.31,1.52) |
|                        |                                       | Cancer                  | 1.20         | (1.10,1.31) | 1.24         | (1.14,1.35) | 1.37         | (1.26,1.49) | 1.29         | (1.18,1.40) |
|                        |                                       | Tobacco use             | 1.06         | (0.98,1.15) | 1.01         | (0.92,1.10) | 1.05         | (0.96,1.16) | 1.13         | (1.03,1.24) |
|                        |                                       | Alcohol/Drug dependence | 1.36         | (1.12,1.64) | 1.52         | (1.22,1.89) | 1.53         | (1.21,1.93) | 1.26         | (1.00,1.61) |
|                        |                                       | Immobility**            | 2.23         | (2.03,2.45) | 2.48         | (2.18,2.81) | 2.65         | (2.36,2.98) | 2.75         | (2.43,3.12) |
| <b>Cause of ESRD</b>   | (ref: Diabetes)                       | Hypertension            | 1.26         | (1.11,1.44) | 1.11         | (0.98,1.27) | 1.14         | (1.04,1.24) | 1.05         | (0.97,1.13) |
|                        |                                       | Glomerular Disease      | 0.85         | (0.74,0.97) | 0.73         | (0.63,0.84) | 0.68         | (0.61,0.76) | 0.69         | (0.62,0.77) |
|                        |                                       | Other                   | 1.30         | (1.13,1.49) | 1.17         | (1.02,1.34) | 1.15         | (1.04,1.28) | 1.05         | (0.96,1.16) |
|                        |                                       | Unknown/Missing         | 1.25         | (1.07,1.46) | 1.07         | (0.92,1.26) | 1.12         | (0.97,1.28) | 0.95         | (0.82,1.10) |
| <b>PD program size</b> | (ref: ≥25 PD patients)                | ≤6 PD patients          | 1.12         | (1.05,1.20) | 1.08         | (1.01,1.17) | 1.06         | (0.97,1.15) | 1.04         | (0.96,1.13) |
|                        |                                       | 7-12 PD patients        | 1.07         | (1.01,1.14) | 1.04         | (0.97,1.11) | 1.01         | (0.94,1.09) | 1.04         | (0.97,1.12) |
|                        |                                       | 13-24 PD patients       | 0.98         | (0.94,1.03) | 1.02         | (0.97,1.07) | 0.97         | (0.92,1.03) | 0.99         | (0.93,1.05) |
| <b>Facility</b>        | (ref: LDO)                            | Hospital-Based          | 1.20         | (1.07,1.34) | 1.13         | (0.98,1.30) | 0.96         | (0.89,1.03) | 0.82         | (0.75,0.90) |

|                          |               |             |      |             |      |             |      |             |      |             |
|--------------------------|---------------|-------------|------|-------------|------|-------------|------|-------------|------|-------------|
| <b>Ownership</b>         |               |             |      |             |      |             |      |             |      |             |
|                          |               | Independent | 1.18 | (1.06,1.32) | 1.14 | (1.00,1.30) | 0.96 | (0.90,1.02) | 1.02 | (0.95,1.09) |
|                          |               | OTHDO       | .    | .           | 1.02 | (0.43,2.44) | 0.94 | (0.88,1.01) | 0.98 | (0.92,1.04) |
| <b>Facility Network</b>  | (ref: NET_01) | NET_02      | 1.07 | (0.97,1.19) | 1.05 | (0.93,1.19) | 0.99 | (0.86,1.15) | 0.84 | (0.71,0.98) |
|                          |               | NET_03      | 1.16 | (1.04,1.30) | 1.12 | (0.97,1.29) | 0.93 | (0.78,1.12) | 0.96 | (0.80,1.16) |
|                          |               | NET_04      | 1.16 | (1.03,1.30) | 1.06 | (0.93,1.21) | 1.03 | (0.88,1.19) | 0.98 | (0.83,1.14) |
|                          |               | NET_05      | 1.11 | (1.00,1.24) | 1.14 | (1.02,1.28) | 1.16 | (1.01,1.33) | 0.93 | (0.80,1.08) |
|                          |               | NET_06      | 1.05 | (0.95,1.17) | 0.99 | (0.89,1.10) | 1.04 | (0.91,1.18) | 0.96 | (0.84,1.10) |
|                          |               | NET_07      | 1.01 | (0.90,1.13) | 0.95 | (0.84,1.08) | 0.99 | (0.86,1.14) | 0.92 | (0.79,1.06) |
|                          |               | NET_08      | 1.17 | (1.04,1.30) | 1.15 | (1.02,1.29) | 1.18 | (1.03,1.36) | 0.95 | (0.82,1.10) |
|                          |               | NET_09      | 1.14 | (1.04,1.25) | 1.14 | (1.03,1.26) | 1.06 | (0.93,1.20) | 1.00 | (0.87,1.14) |
|                          |               | NET_10      | 1.07 | (0.95,1.20) | 1.16 | (1.04,1.31) | 1.18 | (1.03,1.36) | 1.01 | (0.86,1.17) |
|                          |               | NET_11      | 1.12 | (1.02,1.24) | 1.11 | (0.99,1.23) | 1.03 | (0.90,1.17) | 0.95 | (0.82,1.10) |
|                          |               | NET_12      | 0.97 | (0.87,1.08) | 1.14 | (1.02,1.28) | 1.12 | (0.97,1.28) | 0.86 | (0.74,1.00) |
|                          |               | NET_13      | 0.99 | (0.88,1.12) | 1.10 | (0.97,1.25) | 1.02 | (0.88,1.18) | 1.05 | (0.90,1.22) |
|                          |               | NET_14      | 1.06 | (0.95,1.19) | 1.06 | (0.95,1.19) | 1.03 | (0.90,1.19) | 0.97 | (0.84,1.12) |
|                          |               | NET_15      | 0.93 | (0.83,1.05) | 0.96 | (0.84,1.10) | 0.82 | (0.70,0.95) | 0.85 | (0.73,1.00) |
|                          |               | NET_16      | 0.90 | (0.79,1.02) | 0.83 | (0.72,0.95) | 0.95 | (0.82,1.11) | 0.79 | (0.67,0.93) |
|                          |               | NET_17      | 1.00 | (0.89,1.12) | 0.97 | (0.85,1.10) | 0.97 | (0.84,1.12) | 0.85 | (0.73,1.00) |
|                          |               | NET_18      | 0.97 | (0.87,1.08) | 1.05 | (0.93,1.18) | 0.97 | (0.84,1.12) | 0.84 | (0.72,0.97) |
| <b>Facility Location</b> | (ref: Urban)  | Rural       | 1.01 | (0.97,1.07) | 1.03 | (0.97,1.08) | 1.08 | (1.02,1.15) | 1.11 | (1.04,1.18) |

Footnote: In 1996-1999, dialysis facilities were broadly grouped as LDO, independent, and hospital based. The OTHDO (Other Dialysis Organization) category was missing at the time, which is why there are no data for this category during this timeframe. CHF=congestive heart failure; COPD=chronic obstructive pulmonary disease; CVA/TIA=cerebrovascular accident/transient ischemic attack; PVD=peripheral vascular disease; OTHDO=other dialysis organization; NET=network

\*Cardiovascular disease = atherosclerotic heart disease and other cardiac disease

\*\*Immobility = inability to transfer or ambulate

**Table S2c.** Hazard ratios for transplant according to grouped cohort years of PD incidence by patient- and facility-level variables.

|                        |                                       |                         | 1996-1999    |             | 2000-2003    |             | 2004-2007    |             | 2008-2011    |             |
|------------------------|---------------------------------------|-------------------------|--------------|-------------|--------------|-------------|--------------|-------------|--------------|-------------|
| Covariates             |                                       |                         | Hazard ratio | 95% CI      |
| <b>Age (years)</b>     | (ref: 45-64)                          | 0-21                    | 3.25         | (2.98,3.54) | 2.99         | (2.73,3.26) | 3.38         | (3.08,3.70) | 2.90         | (2.64,3.18) |
|                        |                                       | 22-44                   | 1.88         | (1.78,1.99) | 1.73         | (1.63,1.83) | 1.71         | (1.61,1.82) | 1.49         | (1.40,1.59) |
|                        |                                       | 65-74                   | 0.22         | (0.19,0.25) | 0.33         | (0.30,0.37) | 0.47         | (0.43,0.52) | 0.55         | (0.50,0.60) |
|                        |                                       | ≥75                     | 0.02         | (0.01,0.04) | 0.05         | (0.03,0.07) | 0.07         | (0.05,0.09) | 0.08         | (0.06,0.11) |
| <b>Sex</b>             | (ref: Male)                           | Female                  | 0.85         | (0.81,0.90) | 0.83         | (0.79,0.87) | 0.86         | (0.82,0.91) | 0.86         | (0.82,0.91) |
| <b>Race</b>            | (ref: White)                          | African American        | 0.34         | (0.32,0.37) | 0.40         | (0.38,0.44) | 0.45         | (0.42,0.48) | 0.51         | (0.47,0.55) |
|                        |                                       | Asian                   | 0.69         | (0.61,0.79) | 0.67         | (0.59,0.76) | 0.66         | (0.58,0.75) | 0.76         | (0.68,0.85) |
|                        |                                       | Other                   | 0.72         | (0.65,0.80) | 0.64         | (0.57,0.73) | 0.64         | (0.55,0.74) | 0.58         | (0.49,0.70) |
|                        |                                       | Unknown/Missing         | 0.22         | (0.12,0.41) | 0.56         | (0.33,0.94) | 0.67         | (0.38,1.18) | 0.61         | (0.43,0.86) |
| <b>Ethnicity</b>       | (ref: Non-Hispanic)                   | Hispanic                | 0.53         | (0.48,0.58) | 0.60         | (0.55,0.65) | 0.67         | (0.61,0.73) | 0.66         | (0.61,0.72) |
| <b>Comorbidities</b>   | (ref: Without respective comorbidity) | Cardiovascular disease* | 0.68         | (0.62,0.75) | 0.69         | (0.63,0.76) | 0.80         | (0.73,0.87) | 0.78         | (0.71,0.85) |
|                        |                                       | CHF                     | 0.54         | (0.49,0.60) | 0.60         | (0.54,0.66) | 0.54         | (0.48,0.61) | 0.54         | (0.48,0.60) |
|                        |                                       | COPD                    | 0.73         | (0.58,0.92) | 0.49         | (0.37,0.65) | 0.70         | (0.56,0.88) | 0.53         | (0.41,0.68) |
|                        |                                       | CVA/TIA                 | 0.62         | (0.51,0.74) | 0.67         | (0.56,0.80) | 0.63         | (0.53,0.76) | 0.71         | (0.59,0.85) |
|                        |                                       | PVD                     | 0.62         | (0.54,0.72) | 0.59         | (0.50,0.69) | 0.69         | (0.59,0.80) | 0.64         | (0.54,0.76) |
|                        |                                       | Hypertension            | 1.11         | (1.05,1.18) | 1.04         | (0.97,1.11) | 1.05         | (0.98,1.13) | 1.01         | (0.94,1.09) |
|                        |                                       | Diabetes                | 0.85         | (0.66,1.10) | 0.75         | (0.59,0.96) | 0.72         | (0.62,0.84) | 0.71         | (0.63,0.80) |
|                        |                                       | Cancer                  | 0.48         | (0.38,0.61) | 0.47         | (0.38,0.58) | 0.51         | (0.42,0.62) | 0.66         | (0.55,0.79) |
|                        |                                       | Tobacco use             | 0.67         | (0.59,0.76) | 0.60         | (0.53,0.69) | 0.57         | (0.50,0.66) | 0.50         | (0.43,0.59) |
|                        |                                       | Alcohol/Drug dependence | 0.29         | (0.19,0.45) | 0.53         | (0.36,0.79) | 0.75         | (0.52,1.07) | 0.52         | (0.34,0.79) |
|                        |                                       | Immobility**            | 0.39         | (0.26,0.58) | 0.42         | (0.28,0.63) | 0.40         | (0.28,0.56) | 0.65         | (0.50,0.86) |
| <b>Cause of ESRD</b>   | (ref: Diabetes)                       | Hypertension            | 0.87         | (0.67,1.14) | 0.73         | (0.56,0.94) | 0.78         | (0.66,0.91) | 0.83         | (0.73,0.95) |
|                        |                                       | Glomerular Disease      | 1.21         | (0.94,1.57) | 1.08         | (0.84,1.38) | 1.14         | (0.97,1.33) | 1.40         | (1.23,1.60) |
|                        |                                       | Other                   | 1.13         | (0.87,1.47) | 1.10         | (0.85,1.41) | 1.08         | (0.92,1.27) | 1.22         | (1.06,1.39) |
|                        |                                       | Unknown/Missing         | 1.06         | (0.80,1.41) | 0.99         | (0.76,1.31) | 0.93         | (0.77,1.12) | 1.23         | (1.04,1.46) |
| <b>PD program size</b> | (ref: ≥25 PD patients)                | ≤6 PD patients          | 1.00         | (0.92,1.09) | 1.02         | (0.93,1.13) | 1.02         | (0.93,1.12) | 0.95         | (0.86,1.04) |
|                        |                                       | 7-12 PD patients        | 1.13         | (1.05,1.23) | 1.05         | (0.97,1.14) | 0.95         | (0.88,1.03) | 0.97         | (0.90,1.05) |



|                           |               |                   |      |             |      |             |      |             |      |             |
|---------------------------|---------------|-------------------|------|-------------|------|-------------|------|-------------|------|-------------|
|                           |               | 13-24 PD patients | 1.04 | (0.98,1.11) | 1.00 | (0.94,1.07) | 1.00 | (0.93,1.06) | 1.01 | (0.94,1.07) |
| <b>Facility Ownership</b> | (ref: LDO)    | Hospital-Based    | 1.00 | (0.86,1.18) | 0.99 | (0.80,1.23) | 0.98 | (0.91,1.06) | 1.12 | (1.03,1.21) |
|                           |               | Independent       | 0.99 | (0.85,1.16) | 1.03 | (0.84,1.26) | 1.06 | (0.99,1.15) | 1.05 | (0.97,1.13) |
|                           |               | OTHDO             | .    | .           | 0.00 | (0.00,0.02) | 1.11 | (1.03,1.19) | 1.07 | (0.99,1.15) |
| <b>Facility Network</b>   | (ref: NET_01) | NET_02            | 1.02 | (0.87,1.20) | 0.76 | (0.64,0.90) | 1.01 | (0.85,1.21) | 0.88 | (0.73,1.05) |
|                           |               | NET_03            | 1.25 | (1.05,1.49) | 0.91 | (0.75,1.10) | 1.22 | (0.99,1.49) | 1.17 | (0.96,1.44) |
|                           |               | NET_04            | 1.68 | (1.43,1.97) | 1.15 | (0.98,1.36) | 1.24 | (1.04,1.48) | 0.87 | (0.72,1.05) |
|                           |               | NET_05            | 1.32 | (1.13,1.55) | 0.87 | (0.75,1.02) | 1.01 | (0.86,1.18) | 1.09 | (0.92,1.28) |
|                           |               | NET_06            | 1.13 | (0.98,1.31) | 0.90 | (0.78,1.03) | 1.02 | (0.88,1.18) | 0.82 | (0.70,0.96) |
|                           |               | NET_07            | 1.23 | (1.04,1.45) | 1.01 | (0.87,1.19) | 1.02 | (0.87,1.20) | 0.96 | (0.81,1.13) |
|                           |               | NET_08            | 1.07 | (0.91,1.26) | 0.81 | (0.69,0.95) | 0.94 | (0.80,1.11) | 0.91 | (0.77,1.08) |
|                           |               | NET_09            | 1.23 | (1.06,1.42) | 1.07 | (0.93,1.23) | 1.02 | (0.88,1.19) | 0.90 | (0.77,1.06) |
|                           |               | NET_10            | 1.33 | (1.13,1.58) | 1.11 | (0.95,1.30) | 1.10 | (0.93,1.30) | 1.03 | (0.86,1.23) |
|                           |               | NET_11            | 1.52 | (1.31,1.76) | 1.13 | (0.98,1.31) | 1.25 | (1.07,1.46) | 1.16 | (0.98,1.36) |
|                           |               | NET_12            | 0.87 | (0.73,1.04) | 0.89 | (0.76,1.04) | 1.04 | (0.88,1.23) | 1.00 | (0.84,1.18) |
|                           |               | NET_13            | 1.20 | (1.01,1.42) | 0.85 | (0.72,1.01) | 0.97 | (0.81,1.15) | 0.86 | (0.72,1.02) |
|                           |               | NET_14            | 1.12 | (0.96,1.32) | 0.69 | (0.59,0.80) | 0.79 | (0.68,0.92) | 0.74 | (0.62,0.86) |
|                           |               | NET_15            | 1.10 | (0.93,1.30) | 0.83 | (0.71,0.98) | 0.96 | (0.81,1.13) | 0.93 | (0.78,1.10) |
|                           |               | NET_16            | 1.20 | (1.01,1.43) | 1.07 | (0.91,1.25) | 1.01 | (0.86,1.20) | 1.02 | (0.86,1.21) |
|                           |               | NET_17            | 0.71 | (0.60,0.86) | 0.65 | (0.55,0.77) | 0.76 | (0.64,0.90) | 0.82 | (0.69,0.97) |
|                           |               | NET_18            | 0.94 | (0.80,1.10) | 0.60 | (0.51,0.70) | 0.66 | (0.56,0.77) | 0.59 | (0.50,0.70) |
| <b>Facility Location</b>  | (ref: Urban)  | Rural             | 0.90 | (0.83,0.97) | 0.92 | (0.85,0.99) | 0.91 | (0.84,0.99) | 0.90 | (0.83,0.98) |

Footnote: In 1996-1999, dialysis facilities were broadly grouped as LDO, independent, and hospital based. The OTHDO (Other Dialysis Organization) category was missing at the time, which is why there are no data for this category during this timeframe. CHF=congestive heart failure; COPD=chronic obstructive pulmonary disease; CVA/TIA=cerebrovascular accident/transient ischemic attack; PVD=peripheral vascular disease; OTHDO=other dialysis organization; NET=network

\*Cardiovascular disease = atherosclerotic heart disease and other cardiac disease

\*\*Immobility = inability to transfer or ambulate
